# Supplementary material for: Genomic Evidence for Rare Hybridization and Large Demographic Changes in the Evolutionary Histories of Four North American Dove Species
Source: MDPI journal article supplement (doi:10.3390/ani11092677), 2021-09-13
Supplement: s1 [file s1]

Table S2.  $\partial a \partial i$  model likelihood comparisons for pair-wise species comparisons between Rock Pigeons (ROPI), Eurasian Collard-dove (EUCD), White-winged Dove (WWDO), and Mourning Dove (MODO). Optimum models are bolded. Also, note that NaN means  $\partial a \partial i$  was unable to calculate a likelihood value.

|               | $\partial a \partial i$ Model Ln Likelihood |                |           |                |                |
|---------------|---------------------------------------------|----------------|-----------|----------------|----------------|
|               | Neutral                                     | IM             | IM No-Mig | Split Mig      | Split No-Mig   |
| EUCD vs. ROPI | -3907.73                                    | NaN            | -717.40   | <b>-471.47</b> | -1082.68       |
| EUCD vs. MODO | -3121.82                                    | -1102.48       | -637.70   | <b>-261.70</b> | -346.34        |
| EUCD vs. WWDO | -5669.01                                    | -492.09        | -714.45   | <b>-433.55</b> | -591.68        |
| ROPI vs. MODO | -3083.43                                    | -268.77        | -368.49   | <b>-243.47</b> | -353.94        |
| ROPI vs. WWDO | -3900.69                                    | NaN            | -1179.32  | -900.17        | <b>-488.85</b> |
| MODO vs. WWDO | -1403.66                                    | <b>-195.53</b> | -790.85   | -210.92        | -305.17        |
