# Supplementary material for: Genomic Evidence for Rare Hybridization and Large Demographic Changes in the Evolutionary Histories of Four North American Dove Species
Source: Animals (Basel). 2021 Sep 13;11(9):2677. doi: 10.3390/ani11092677 (PMC8468798; doi:10.3390/ani11092677)
Supplement: Supplementary file 1 [file animals-11-02677-s001.zip]

Archive with 9 entries (9 files):
- RAD.DOV.Supp.Info.Doc.S1.pdf
- RAD.DOV.Supp.Info.FIG.S1.png
- RAD.DOV.Supp.Info.FIG.S2.png
- RAD.DOV.Supp.Info.FIG.S3.png
- RAD.DOV.Supp.Info.FIG.S4.png
- RAD.DOV.Supp.Info.FIG.S5.png
- RAD.DOV.Supp.Info.FIG.S6.png
- RAD.DOV.Supp.Mat.Table.S1.xlsx
- RAD.DOV.Supp.Mat.Table.S2.pdf
