# Supplementary material for: Genomic Evidence for Rare Hybridization and Large Demographic Changes in the Evolutionary Histories of Four North American Dove Species
Source: Animals (Basel). 2021 Sep 13;11(9):2677. doi: 10.3390/ani11092677 (PMC8468798; doi:10.3390/ani11092677)
Supplement: Supplementary file 1 [file animals-11-02677-s001.zip › RAD.DOV.Supp.Mat.Table.S1.xlsx]

## Sheet: Figure S1
Figure S1. Sample information including sex, date of collection, and latitude and longitude of sampling location. Per sample accession numbers associated with raw mtDNA and nuclear Illumina Hiseq data are provided.
Sample ID	Common Name	Species	Sex	Date	Latitude	Longitude	Genbank mtDNA Accession Num.	SRA BioPoject PRJNA761761 Raw ddRAD Accession Num.
DOV001	White-winged Dove	Zenaida asiatica	M	2019-09-01	31.792	-106.642	OK086092	SAMN21362192
DOV002	White-winged Dove	Zenaida asiatica	M	2019-09-01	31.792	-106.642	OK086093	SAMN21362193
DOV003	White-winged Dove	Zenaida asiatica	M	2019-09-01	31.792	-106.642	OK086094	SAMN21362194
DOV004	White-winged Dove	Zenaida asiatica	F	2019-09-01	31.792	-106.642	OK086095	SAMN21362195
DOV005	White-winged Dove	Zenaida asiatica	F	2019-09-01	31.792	-106.642	OK086096	SAMN21362196
DOV006	White-winged Dove	Zenaida asiatica	M	2019-09-01	31.792	-106.642	OK086097	SAMN21362197
DOV007	White-winged Dove	Zenaida asiatica	F	2019-09-01	31.792	-106.642	OK086098	SAMN21362198
DOV008	White-winged Dove	Zenaida asiatica	F	2019-09-01	31.792	-106.642	OK086099	SAMN21362199
DOV009	Mourning Dove	Zenaida macroura	F	2019-09-01	31.792	-106.642	OK086100	SAMN21362200
DOV010	Mourning Dove	Zenaida macroura	F	2019-09-01	31.792	-106.642	OK086101	SAMN21362201
DOV011	Mourning Dove	Zenaida macroura	M	2019-09-01	32.1186	-106.676	OK086102	SAMN21362202
DOV012	Mourning Dove	Zenaida macroura	M	2019-09-01	32.1186	-106.676	OK086103	SAMN21362203
DOV013	Mourning Dove	Zenaida macroura	M	2019-09-01	32.1186	-106.676	OK086104	SAMN21362204
DOV014	Mourning Dove	Zenaida macroura	F	2019-09-01	32.1186	-106.676	OK086105	SAMN21362205
DOV015	Mourning Dove	Zenaida macroura	M	2019-09-01	32.1186	-106.676	OK086106	SAMN21362206
DOV016	Mourning Dove	Zenaida macroura	M	2019-09-01	31.792	-106.642	OK086107	SAMN21362207
DOV017	Mourning Dove	Zenaida macroura	M	2019-09-01	31.792	-106.642	OK086108	SAMN21362208
DOV018	Mourning Dove	Zenaida macroura	F	2019-09-01	31.792	-106.642	OK086109	SAMN21362209
DOV019	Mourning Dove	Zenaida macroura	M	2019-09-01	31.792	-106.642	OK086110	SAMN21362210
DOV020	Mourning Dove	Zenaida macroura	M	2019-09-01	31.792	-106.642	OK086111	SAMN21362211
DOV021	Mourning Dove	Zenaida macroura	M	2019-09-01	31.792	-106.642	OK086112	SAMN21362212
DOV022	Mourning Dove	Zenaida macroura	M	2019-09-01	31.792	-106.642	OK086113	SAMN21362213
DOV023	Mourning Dove	Zenaida macroura	M	2019-09-01	31.792	-106.642	OK086114	SAMN21362214
DOV024	Mourning Dove	Zenaida macroura	F	2019-09-01	31.792	-106.642	OK086115	SAMN21362215
DOV025	White-winged Dove	Zenaida asiatica	F	2019-09-01	31.792	-106.642	OK086116	SAMN21362216
DOV026	White-winged Dove	Zenaida asiatica	F	2019-09-01	31.792	-106.642	OK086117	SAMN21362217
DOV027	White-winged Dove	Zenaida asiatica	F	2019-09-01	31.792	-106.642	OK086118	SAMN21362218
DOV028	White-winged Dove	Zenaida asiatica	F	2019-09-01	31.792	-106.642	OK086119	SAMN21362219
DOV029	White-winged Dove	Zenaida asiatica	M	2019-09-01	31.792	-106.642	OK086120	SAMN21362220
DOV030	White-winged Dove	Zenaida asiatica	M	2019-09-01	31.792	-106.642	OK086121	SAMN21362221
DOV031	White-winged Dove	Zenaida asiatica	F	2019-09-02	31.792	-106.642	OK086122	SAMN21362222
DOV032	White-winged Dove	Zenaida asiatica	F	2019-09-02	31.792	-106.642	OK086123	SAMN21362223
DOV033	White-winged Dove	Zenaida asiatica	F	2019-09-02	31.792	-106.642	OK086124	SAMN21362224
DOV034	White-winged Dove	Zenaida asiatica	F	2019-09-02	31.792	-106.642	OK086125	SAMN21362225
DOV035	White-winged Dove	Zenaida asiatica	F	2019-09-02	31.792	-106.642	OK086126	SAMN21362226
DOV036	White-winged Dove	Zenaida asiatica	M	2019-09-02	31.792	-106.642	OK086127	SAMN21362227
DOV037	White-winged Dove	Zenaida asiatica	M	2019-09-02	31.792	-106.642	OK086128	SAMN21362228
DOV038	White-winged Dove	Zenaida asiatica	M	2019-09-02	31.792	-106.642	OK086129	SAMN21362229
DOV039	White-winged Dove	Zenaida asiatica	M	2019-09-02	31.792	-106.642	OK086130	SAMN21362230
DOV040	White-winged Dove	Zenaida asiatica	M	2019-09-02	31.792	-106.642	OK086131	SAMN21362231
DOV041	White-winged Dove	Zenaida asiatica	F	2019-09-02	31.792	-106.642	OK086132	SAMN21362232
DOV042	White-winged Dove	Zenaida asiatica	M	2019-09-02	31.792	-106.642	OK086133	SAMN21362233
DOV043	White-winged Dove	Zenaida asiatica	M	2019-09-02	31.792	-106.642	OK086134	SAMN21362234
DOV044	White-winged Dove	Zenaida asiatica	M	2019-09-02	31.792	-106.642	OK086135	SAMN21362235
DOV045	White-winged Dove	Zenaida asiatica	M	2019-09-02	31.792	-106.642	OK086136	SAMN21362236
DOV046	White-winged Dove	Zenaida asiatica	F	2019-09-01	31.792	-106.642	OK086137	SAMN21362237
DOV047	White-winged Dove	Zenaida asiatica	M	2019-09-01	31.792	-106.642	OK086138	SAMN21362238
DOV048	White-winged Dove	Zenaida asiatica	M	2019-09-01	31.792	-106.642	OK086139	SAMN21362239
DOV049	White-winged Dove	Zenaida asiatica	M	2019-09-01	31.792	-106.642	OK086140	SAMN21362240
DOV050	White-winged Dove	Zenaida asiatica	F	2019-09-01	31.792	-106.642	OK086141	SAMN21362241
DOV051	White-winged Dove	Zenaida asiatica	M	2019-09-01	31.792	-106.642	OK086142	SAMN21362242
DOV052	White-winged Dove	Zenaida asiatica	M	2019-09-01	31.792	-106.642	OK086143	SAMN21362243
DOV053	White-winged Dove	Zenaida asiatica	F	2019-09-01	31.792	-106.642	OK086144	SAMN21362244
DOV054	White-winged Dove	Zenaida asiatica	F	2019-09-01	31.792	-106.642	OK086145	SAMN21362245
DOV055	White-winged Dove	Zenaida asiatica	M	2019-09-01	31.792	-106.642	OK086146	SAMN21362246
DOV056	White-winged Dove	Zenaida asiatica	F	2019-09-01	31.792	-106.642	OK086147	SAMN21362247
DOV057	White-winged Dove	Zenaida asiatica	M	2019-09-01	31.792	-106.642	OK086148	SAMN21362248
DOV058	White-winged Dove	Zenaida asiatica	F	2019-09-01	31.792	-106.642	OK086149	SAMN21362249
DOV059	White-winged Dove	Zenaida asiatica	M	2019-09-01	31.792	-106.642	OK086150	SAMN21362250
DOV060	White-winged Dove	Zenaida asiatica	M	2019-09-01	31.792	-106.642	OK086151	SAMN21362251
DOV061	White-winged Dove	Zenaida asiatica	M	2019-09-01	31.792	-106.642	OK086152	SAMN21362252
DOV064	White-winged Dove	Zenaida asiatica	F	2019-09-01	31.792	-106.642	OK086153	SAMN21362253
DOV065	White-winged Dove	Zenaida asiatica	F	2019-09-01	31.792	-106.642	OK086154	SAMN21362254
DOV066	White-winged Dove	Zenaida asiatica	M	2019-09-01	31.792	-106.642	OK086155	SAMN21362255
DOV067	White-winged Dove	Zenaida asiatica	M	2019-09-01	31.792	-106.642	OK086156	SAMN21362256
DOV068	White-winged Dove	Zenaida asiatica	F	2019-09-01	31.792	-106.642	OK086157	SAMN21362257
DOV069	White-winged Dove	Zenaida asiatica	F	2019-09-01	31.792	-106.642	OK086158	SAMN21362258
DOV070	Mourning Dove	Zenaida macroura	M	2019-09-01	31.792	-106.642	OK086159	SAMN21362259
DOV071	Mourning Dove	Zenaida macroura	M	2019-09-01	31.792	-106.642	OK086160	SAMN21362260
DOV072	Mourning Dove	Zenaida macroura	M	2019-09-01	31.792	-106.642	OK086161	SAMN21362261
DOV073	Mourning Dove	Zenaida macroura	M	2019-09-01	31.792	-106.642	OK086162	SAMN21362262
DOV074	Mourning Dove	Zenaida macroura	F	2019-09-01	31.792	-106.642	OK086163	SAMN21362263
DOV075	Mourning Dove	Zenaida macroura	M	2019-09-01	31.792	-106.642	OK086164	SAMN21362264
DOV076	Mourning Dove	Zenaida macroura	M	2019-09-01	31.792	-106.642	OK086165	SAMN21362265
DOV077	Mourning Dove	Zenaida macroura	M	2019-09-01	31.792	-106.642	OK086166	SAMN21362266
DOV078	Mourning Dove	Zenaida macroura	F	2019-09-01	31.792	-106.642	OK086167	SAMN21362267
DOV079	Mourning Dove	Zenaida macroura	F	2019-09-01	31.792	-106.642	OK086168	SAMN21362268
DOV080	Mourning Dove	Zenaida macroura	M	2019-09-01	31.792	-106.642	OK086169	SAMN21362269
DOV081	Mourning Dove	Zenaida macroura	F	2019-09-01	31.792	-106.642	OK086170	SAMN21362270
DOV082	Mourning Dove	Zenaida macroura	F	2019-09-01	31.792	-106.642	OK086171	SAMN21362271
DOV083	Mourning Dove	Zenaida macroura	M	2019-09-01	31.792	-106.642	OK086172	SAMN21362272
DOV084	Mourning Dove	Zenaida macroura	M	2019-09-01	31.792	-106.642	OK086173	SAMN21362273
DOV085	Mourning Dove	Zenaida macroura	M	2019-09-15	32.1186	-106.676	OK086174	SAMN21362274
DOV086	Mourning Dove	Zenaida macroura	M	2019-09-15	32.1186	-106.676	OK086175	SAMN21362275
DOV087	Mourning Dove	Zenaida macroura	F	2019-09-15	32.1186	-106.676	OK086176	SAMN21362276
DOV088	Mourning Dove	Zenaida macroura	F	2019-09-15	32.1186	-106.676	OK086177	SAMN21362277
DOV089	Mourning Dove	Zenaida macroura	M	2019-09-15	32.1186	-106.676	OK086178	SAMN21362278
DOV090	Mourning Dove	Zenaida macroura	M	2019-09-15	32.1186	-106.676	OK086179	SAMN21362279
DOV091	Mourning Dove	Zenaida macroura	M	2019-09-15	32.1186	-106.676	OK086180	SAMN21362280
DOV092	Mourning Dove	Zenaida macroura	M	2019-09-15	32.1186	-106.676	OK086181	SAMN21362281
DOV093	Mourning Dove	Zenaida macroura	M	2019-09-06	32.1186	-106.676	OK086182	SAMN21362282
DOV094	Mourning Dove	Zenaida macroura	M	2019-09-06	32.1186	-106.676	OK086183	SAMN21362283
DOV095	Mourning Dove	Zenaida macroura	F	2019-09-06	32.1186	-106.676	OK086184	SAMN21362284
DOV096	Eurasian Mourning Dove	Streptopelia decaocto	F	2019-09-14	32.1186	-106.676	OK086185	SAMN21362285
DOV097	Eurasian Mourning Dove	Streptopelia decaocto	F	2019-09-14	32.1186	-106.676	OK086186	SAMN21362286
DOV098	White-winged Dove	Zenaida asiatica	M	2019-09-15	32.1186	-106.676	OK086187	SAMN21362287
DOV099	Mourning Dove	Zenaida macroura	M	2019-09-14	32.1186	-106.676	Didn't Work	SAMN21362288
DOV100	Mourning Dove	Zenaida macroura	M	2019-09-14	32.1186	-106.676	OK086188	SAMN21362289
DOV101	Mourning Dove	Zenaida macroura	M	2019-09-14	32.1186	-106.676	OK086189	SAMN21362290
DOV102	Mourning Dove	Zenaida macroura	F	2019-09-14	32.1186	-106.676	OK086190	SAMN21362291
DOV103	Mourning Dove	Zenaida macroura	M	2019-09-14	32.1186	-106.676	OK086191	SAMN21362292
DOV104	Mourning Dove	Zenaida macroura	M	2019-09-07	32.1186	-106.676	OK086192	SAMN21362293
DOV105	Mourning Dove	Zenaida macroura	M	2019-09-16	32.1186	-106.676	OK086193	SAMN21362294
DOV106	Mourning Dove	Zenaida macroura	M	2019-09-16	32.1186	-106.676	OK086194	SAMN21362295
DOV107	Mourning Dove	Zenaida macroura	M	2019-09-16	32.1186	-106.676	OK086195	SAMN21362296
DOV108	Mourning Dove	Zenaida macroura	M	2019-09-16	32.1186	-106.676	OK086196	SAMN21362297
DOV109	Mourning Dove	Zenaida macroura	F	2019-09-16	32.1186	-106.676	OK086197	SAMN21362298
DOV110	Mourning Dove	Zenaida macroura	F	2019-09-14	32.1186	-106.676	OK086198	SAMN21362299
DOV111	Mourning Dove	Zenaida macroura	F	2019-09-14	32.1186	-106.676	OK086199	SAMN21362300
DOV112	Mourning Dove	Zenaida macroura	F	2019-09-14	32.1186	-106.676	OK086200	SAMN21362301
DOV113	Mourning Dove	Zenaida macroura	M	2019-09-14	32.1186	-106.676	OK086201	SAMN21362302
DOV114	White-winged Dove	Zenaida asiatica	F	2019-09-06	32.1186	-106.676	OK086202	SAMN21362303
DOV115	White-winged Dove	Zenaida asiatica	M	2019-09-06	32.1186	-106.676	OK086203	SAMN21362304
DOV117	White-winged Dove	Zenaida asiatica	M	2019-09-06	32.1186	-106.676	OK086204	SAMN21362305
DOV118	White-winged Dove	Zenaida asiatica	F	2019-09-06	32.1186	-106.676	OK086205	SAMN21362306
DOV119	White-winged Dove	Zenaida asiatica	M	2019-09-06	32.1186	-106.676	OK086206	SAMN21362307
DOV121	White-winged Dove	Zenaida asiatica	F	2019-09-26	31.7842	-106.666	OK086207	SAMN21362308
DOV122	White-winged Dove	Zenaida asiatica	F	2019-09-26	31.7842	-106.666	OK086208	SAMN21362309
DOV123	Eurasian Mourning Dove	Streptopelia decaocto	F	2019-09-26	31.7842	-106.666	OK086209	SAMN21362310
DOV124	Eurasian Mourning Dove	Streptopelia decaocto	M	2019-09-26	31.7842	-106.666	OK086210	SAMN21362311
DOV125	Eurasian Mourning Dove	Streptopelia decaocto	M	2019-09-26	31.7842	-106.666	OK086211	SAMN21362312
DOV126	Eurasian Mourning Dove	Streptopelia decaocto	M	2019-09-26	31.7842	-106.666	OK086212	SAMN21362313
DOV127	Eurasian Mourning Dove	Streptopelia decaocto	M	2019-09-26	31.7842	-106.666	OK086213	SAMN21362314
DOV128	Eurasian Mourning Dove	Streptopelia decaocto	F	2019-09-26	31.7842	-106.666	OK086214	SAMN21362315
DOV129	Eurasian Mourning Dove	Streptopelia decaocto	F	2019-09-26	31.7842	-106.666	OK086215	SAMN21362316
DOV130	Eurasian Mourning Dove	Streptopelia decaocto	F	2019-09-26	31.7842	-106.666	OK086216	SAMN21362317
DOV131	Eurasian Mourning Dove	Streptopelia decaocto	M	2019-09-26	31.784	-106.677	OK086217	SAMN21362318
DOV132	Eurasian Mourning Dove	Streptopelia decaocto	F	2019-09-26	31.784	-106.677	OK086218	SAMN21362319
DOV133	Eurasian Mourning Dove	Streptopelia decaocto	M	2019-09-26	31.784	-106.677	OK086219	SAMN21362320
DOV134	Eurasian Mourning Dove	Streptopelia decaocto	F	2019-09-26	31.784	-106.677	OK086220	SAMN21362321
DOV135	Eurasian Mourning Dove	Streptopelia decaocto	M	2019-09-26	31.784	-106.677	OK086221	SAMN21362322
DOV136	Eurasian Mourning Dove	Streptopelia decaocto	M	2019-09-26	31.784	-106.677	OK086222	SAMN21362323
DOV137	Eurasian Mourning Dove	Streptopelia decaocto	F	2019-09-26	31.784	-106.677	OK086223	SAMN21362324
DOV138	Eurasian Mourning Dove	Streptopelia decaocto	F	2019-09-26	31.784	-106.677	OK086224	SAMN21362325
DOV139	Eurasian Mourning Dove	Streptopelia decaocto	M	2019-09-26	31.784	-106.677	OK086225	SAMN21362326
DOV140	Eurasian Mourning Dove	Streptopelia decaocto	F	2019-09-26	31.784	-106.677	OK086226	SAMN21362327
DOV141	Eurasian Mourning Dove	Streptopelia decaocto	F	2019-09-26	31.784	-106.677	OK086227	SAMN21362328
DOV142	Eurasian Mourning Dove	Streptopelia decaocto	F	2019-09-26	31.784	-106.677	OK086228	SAMN21362329
DOV143	Eurasian Mourning Dove	Streptopelia decaocto	F	2019-09-26	31.784	-106.677	OK086229	SAMN21362330
DOV144	Eurasian Mourning Dove	Streptopelia decaocto	F	2019-09-26	31.784	-106.677	OK086230	SAMN21362331
DOV145	Eurasian Mourning Dove	Streptopelia decaocto	F	2019-09-26	31.784	-106.677	OK086231	SAMN21362332
DOV146	Eurasian Mourning Dove	Streptopelia decaocto	M	2019-09-26	31.784	-106.677	OK086232	SAMN21362333
DOV147	Eurasian Mourning Dove	Streptopelia decaocto	M	2019-09-26	31.784	-106.677	OK086233	SAMN21362334
DOV148	Eurasian Mourning Dove	Streptopelia decaocto	M	2019-09-26	31.784	-106.677	OK086234	SAMN21362335
DOV149	Eurasian Mourning Dove	Streptopelia decaocto	F	2019-09-26	31.784	-106.677	OK086235	SAMN21362336
DOV150	Rock Pigeon	Columba livia	M	2019-09-26	31.7842	-106.666	OK086236	SAMN21362337
DOV151	Mourning Dove	Zenaida macroura	M	2019-09-26	31.7842	-106.666	OK086237	SAMN21362338
DOV152	Mourning Dove	Zenaida macroura	F	2019-09-26	31.7842	-106.666	OK086238	SAMN21362339
DOV153	Mourning Dove	Zenaida macroura	F	2019-09-26	31.7842	-106.666	OK086239	SAMN21362340
DOV154	Mourning Dove	Zenaida macroura	F	2019-09-26	31.7842	-106.666	OK086240	SAMN21362341
DOV155	Rock Pigeon	Columba livia	M	2019-10-10	31.7853	-106.675	OK086241	SAMN21362342
DOV156	Rock Pigeon	Columba livia	F	2019-10-10	31.7853	-106.675	OK086242	SAMN21362343
DOV157	Rock Pigeon	Columba livia	M	2019-10-10	31.7853	-106.675	OK086243	SAMN21362344
DOV158	Rock Pigeon	Columba livia	M	2019-10-10	31.7853	-106.675	OK086244	SAMN21362345
DOV159	Rock Pigeon	Columba livia	F	2019-10-10	31.7853	-106.675	OK086245	SAMN21362346
DOV160	Rock Pigeon	Columba livia	M	2019-10-10	31.7853	-106.675	OK086246	SAMN21362347
DOV161	Rock Pigeon	Columba livia	M	2019-10-10	31.7853	-106.675	OK086247	SAMN21362348
DOV162	Rock Pigeon	Columba livia	F	2019-10-10	31.7853	-106.675	OK086248	SAMN21362349
DOV163	Rock Pigeon	Columba livia	F	2019-10-10	31.7853	-106.675	OK086249	SAMN21362350
DOV164	Rock Pigeon	Columba livia	F	2019-10-10	31.7853	-106.675	OK086250	SAMN21362351
DOV165	Rock Pigeon	Columba livia	M	2019-10-10	31.7853	-106.675	OK086251	SAMN21362352
DOV166	Rock Pigeon	Columba livia	F	2019-10-10	31.7853	-106.675	OK086252	SAMN21362353
DOV167	Rock Pigeon	Columba livia	M	2019-10-10	31.7853	-106.675	OK086253	SAMN21362354
DOV168	Rock Pigeon	Columba livia	F	2019-10-10	31.7853	-106.675	OK086254	SAMN21362355
DOV169	Rock Pigeon	Columba livia	M	2019-10-10	31.7853	-106.675	OK086255	SAMN21362356
DOV170	Rock Pigeon	Columba livia	M	2019-10-10	31.7853	-106.675	OK086256	SAMN21362357
DOV171	Rock Pigeon	Columba livia	F	2019-10-10	31.7853	-106.675	OK086257	SAMN21362358
DOV172	Rock Pigeon	Columba livia	M	2019-10-10	31.7853	-106.675	OK086258	SAMN21362359
DOV173	Rock Pigeon	Columba livia	M	2019-10-10	31.7853	-106.675	OK086259	SAMN21362360
DOV174	Rock Pigeon	Columba livia	F	2019-10-10	31.7853	-106.675	OK086260	SAMN21362361
DOV175	Rock Pigeon	Columba livia	M	2019-10-10	31.7853	-106.675	OK086261	SAMN21362362
DOV176	Rock Pigeon	Columba livia	M	2019-10-10	31.7853	-106.675	OK086262	SAMN21362363
DOV177	Rock Pigeon	Columba livia	F	2019-10-10	31.7853	-106.675	OK086263	SAMN21362364
DOV178	Rock Pigeon	Columba livia	F	2019-10-10	31.7853	-106.675	OK086264	SAMN21362365
DOV179	Rock Pigeon	Columba livia	F	2019-10-10	31.7853	-106.675	OK086265	SAMN21362366
DOV180	Rock Pigeon	Columba livia	M	2019-10-10	31.7853	-106.675	OK086266	SAMN21362367
DOV181	Rock Pigeon	Columba livia	F	2019-10-10	31.7853	-106.675	OK086267	SAMN21362368
DOV182	Rock Pigeon	Columba livia	M	2019-10-10	31.7853	-106.675	OK086268	SAMN21362369
DOV183	Rock Pigeon	Columba livia	M	2019-10-10	31.7853	-106.675	OK086269	SAMN21362370
DOV184	Rock Pigeon	Columba livia	M	2019-10-10	31.7853	-106.675	OK086270	SAMN21362371
DOV185	Rock Pigeon	Columba livia	M	2019-10-10	31.7853	-106.675	OK086271	SAMN21362372
DOV186	Rock Pigeon	Columba livia	F	2019-10-10	31.7853	-106.675	OK086272	SAMN21362373
